# Supplementary material for: Titanium and manganese complexes supported by a xanthene-bridged bis(tripodal N2O2) ligand: isomerization, intramolecular hydrogen bonding and metal-binding ability
Source: Royal Society of Chemistry journal article supplement (doi:10.1039/c3dt51389k), 2013-01-01
Supplement: c3dt51389k.pdf [file c3dt51389k.pdf]

## Supplementary Information

### **Titanium and manganese complexes supported by a xanthene-bridged bis(tripodal N<sub>2</sub>O<sub>2</sub>) ligand: isomerization, intramolecular hydrogen bonding and metal-binding ability**

Masakazu Hirotsu,<sup>\*a</sup> Keisuke Kawamoto,<sup>a</sup> Rika Tanaka,<sup>b</sup> Yuji Nagai,<sup>c</sup> Keiji Ueno,<sup>c</sup> Yoshio Teki<sup>a</sup> and Isamu Kinoshita<sup>a</sup>

<sup>a</sup> Department of Chemistry, Graduate School of Science, Osaka City University, Sumiyoshi-ku, Osaka 558-8585.

<sup>b</sup> X-ray Crystal Structure Analysis Laboratory, Graduate School of Engineering, Osaka City University, Sumiyoshi-ku, Osaka 558-8585, Japan.

<sup>c</sup> Department of Chemistry and Chemical Biology, Graduate School of Engineering, Gunma University, Kiryu 376-8515, Japan.

E-mail: mhiro@sci.osaka-cu.ac.jp

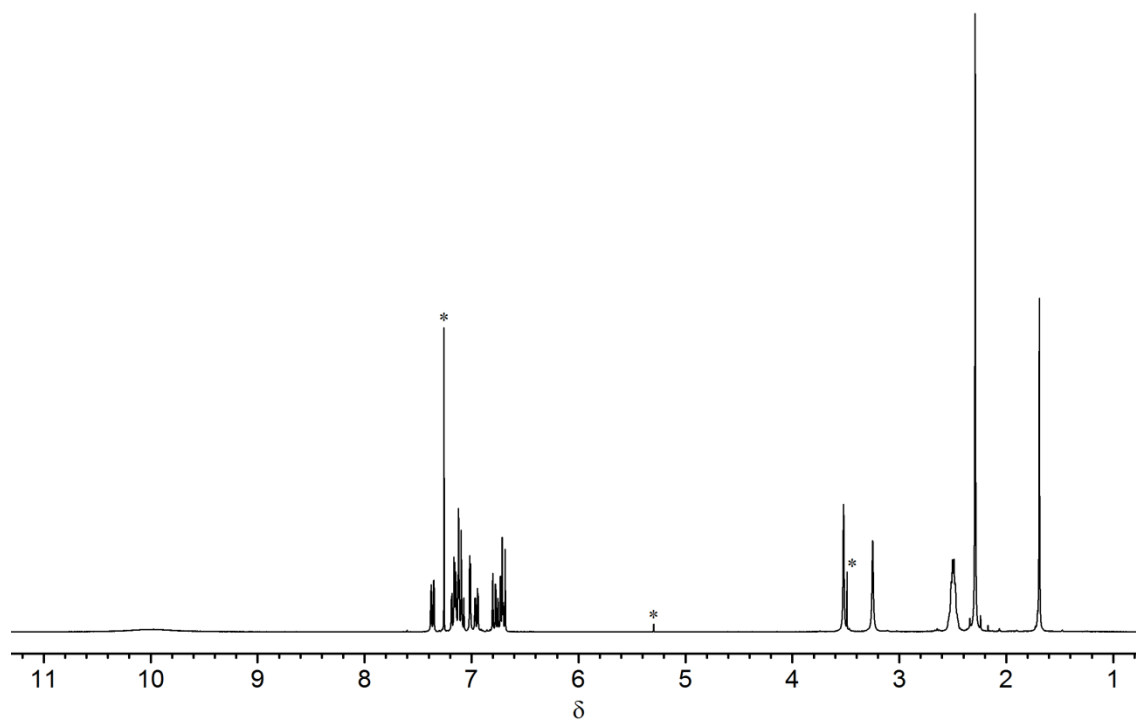

**Figure S1.**  $^1\text{H}$  NMR spectrum (300 MHz,  $\text{CDCl}_3$ ) of  $\text{H}_4\text{L}$ . Residual solvent signals are marked with an asterisk.

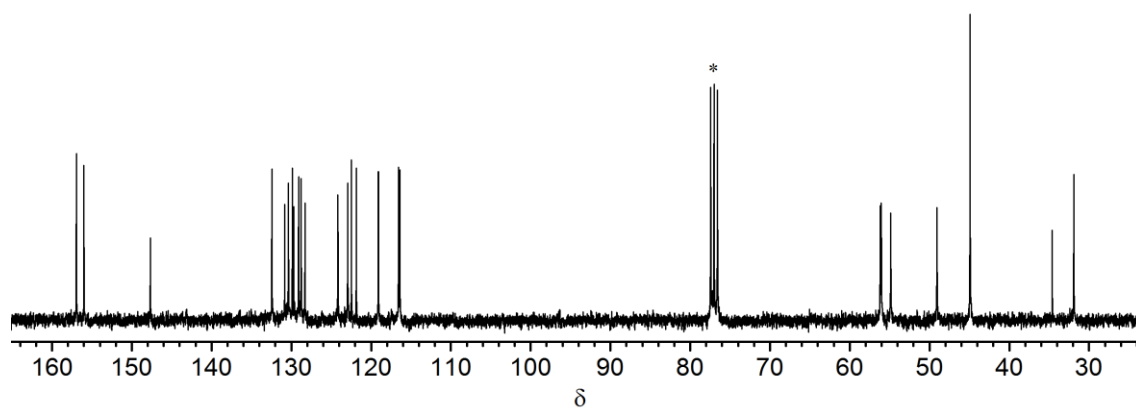

**Figure S2.**  $^{13}\text{C}\{^1\text{H}\}$  NMR spectrum (75.5 MHz,  $\text{CDCl}_3$ ) of  $\text{H}_4\text{L}$ . Residual solvent signals are marked with an asterisk.

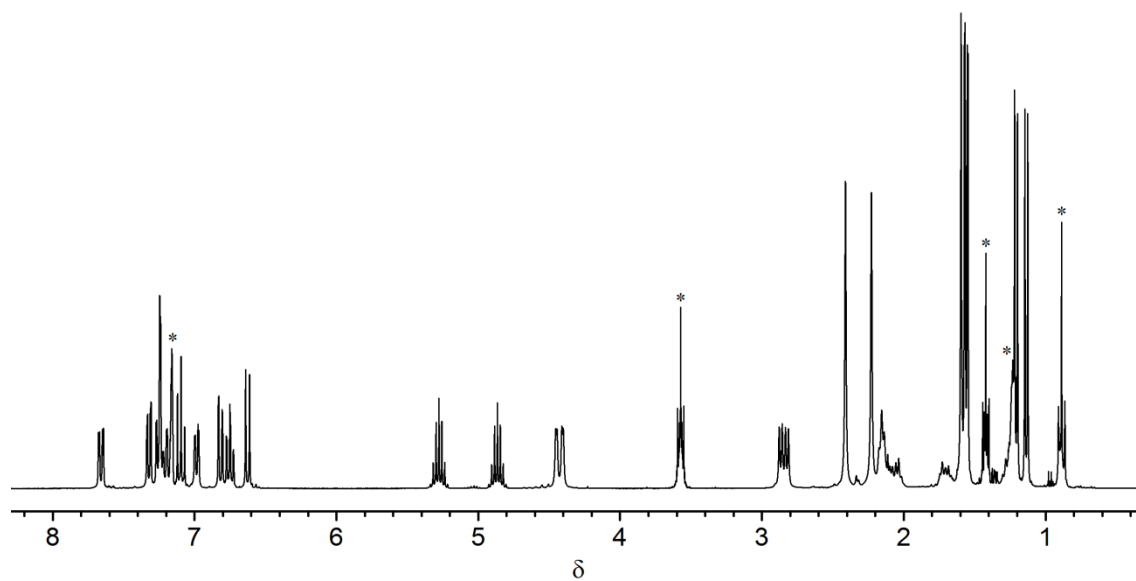

**Figure S3.**  $^1\text{H}$  NMR spectrum (300 MHz,  $\text{C}_6\text{D}_6$ ) of **1a**. Residual solvent signals are marked with an asterisk.

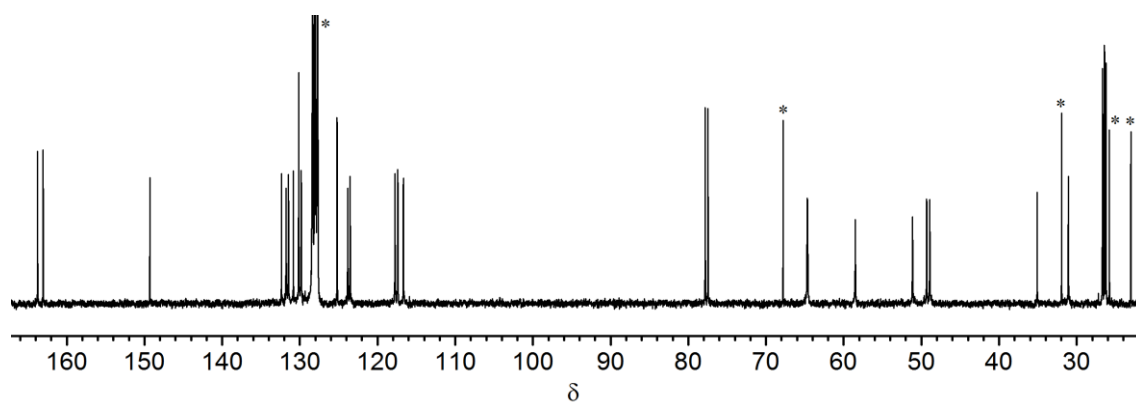

**Figure S4.**  $^{13}\text{C}\{^1\text{H}\}$  NMR spectrum (75.5 MHz,  $\text{C}_6\text{D}_6$ ) of **1a**. Residual solvent signals are marked with an asterisk.

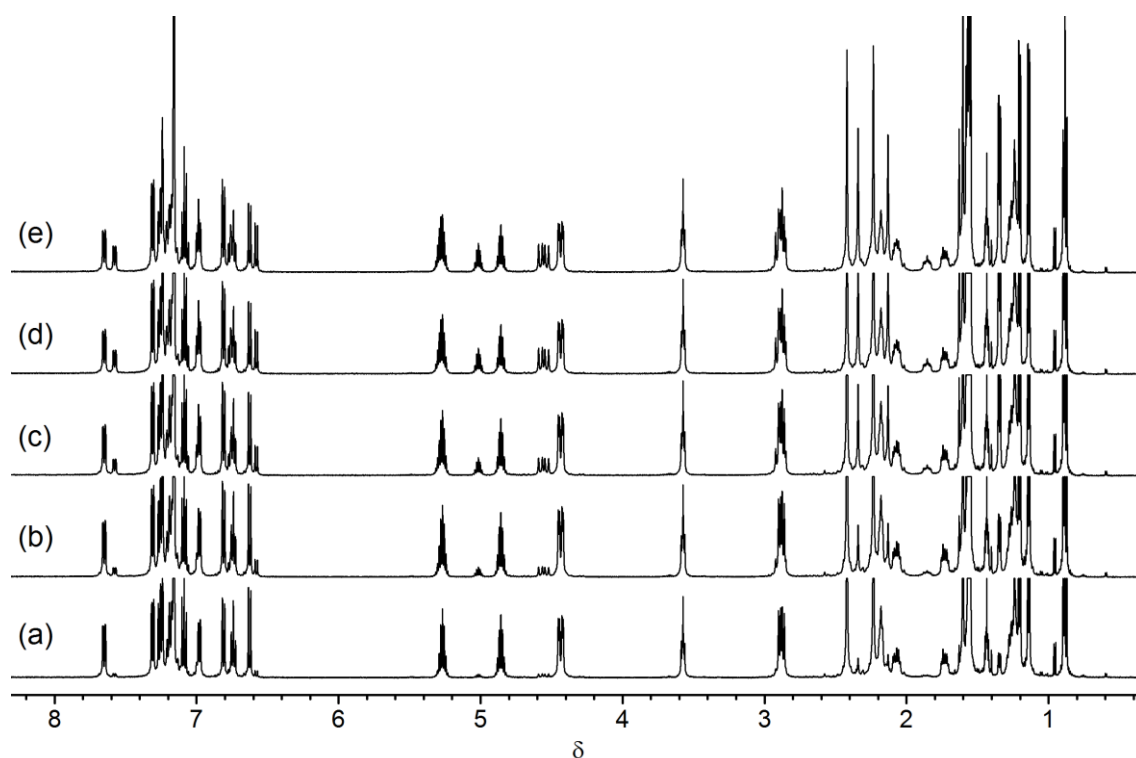

**Figure S5.**  $^1\text{H}$  NMR spectra (300 MHz) of a  $\text{C}_6\text{D}_6$  solution of **1a**, which is isomerized to **1b** at 40 °C: (a) 0 min, (b) 30 min, (c) 90 min, (d) 240 min, (e) 600 min.

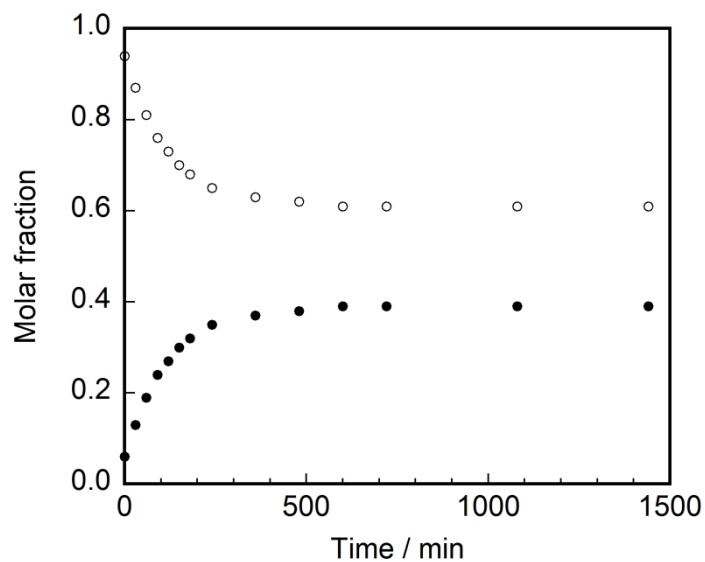

**Figure S6.** Isomerization of **1a** (open circle) to **1b** (solid circle) at 40 °C in  $\text{C}_6\text{D}_6$  monitored by  $^1\text{H}$  NMR spectroscopy.

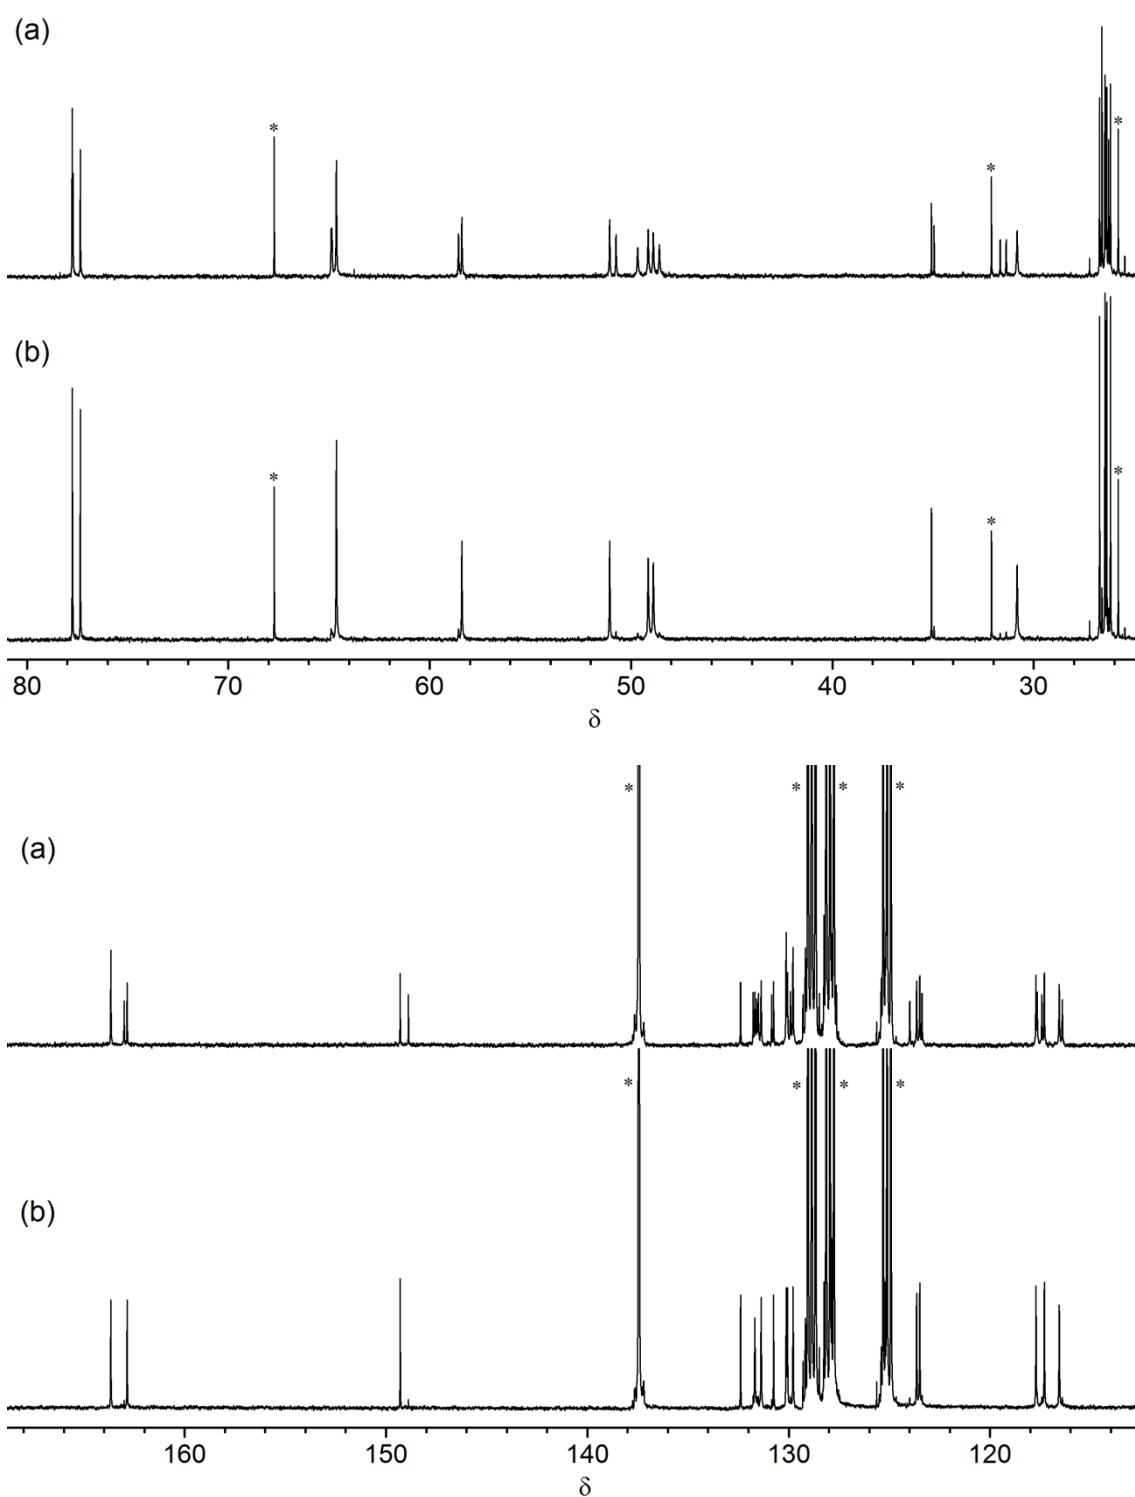

**Figure S7.**  $^{13}\text{C}\{^1\text{H}\}$  NMR spectrum (125.7 MHz, toluene- $d_8$ , 0 °C) of (a) **1a** and (b) a mixture of **1a** and **1b** after isomerization experiments. Residual solvent signals are marked with an asterisk.

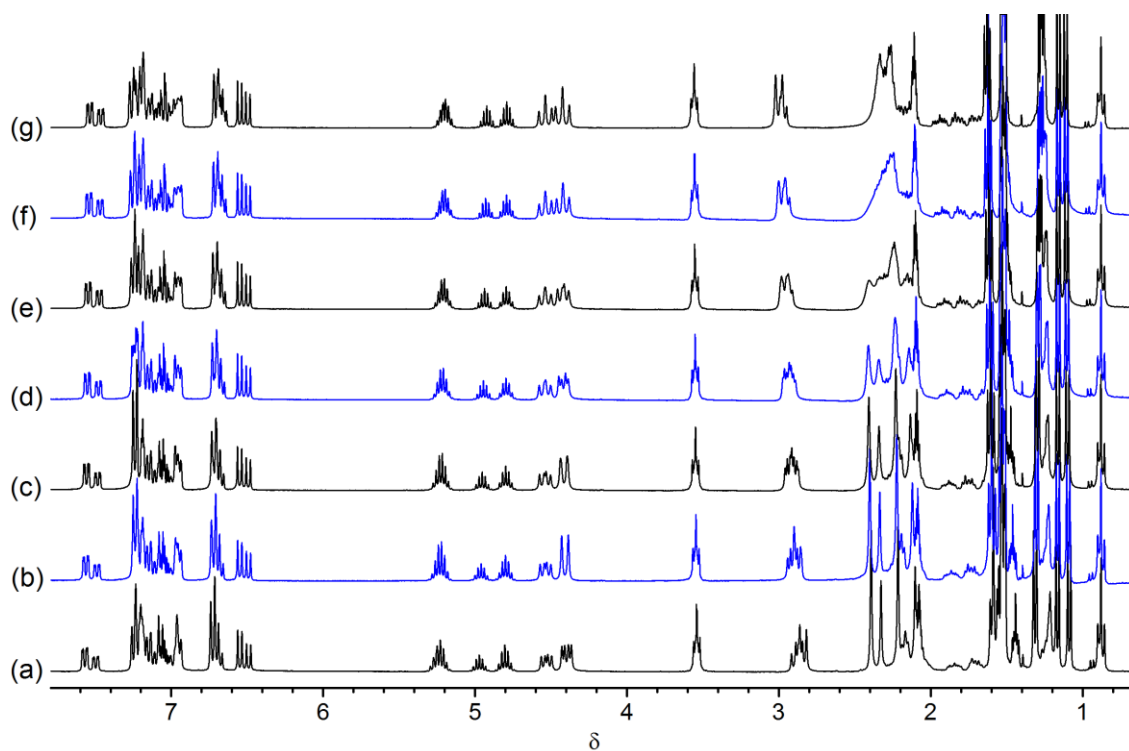

**Figure S8.** Temperature-dependent  $^1\text{H}$  NMR spectra of a toluene- $d_8$  solution containing **1a** and **1b** in equilibrium at (a) 20 °C, (b) 40 °C, (c) 50 °C, (d) 60 °C, (e) 70 °C, (f) 80 °C, and (g) 90 °C.

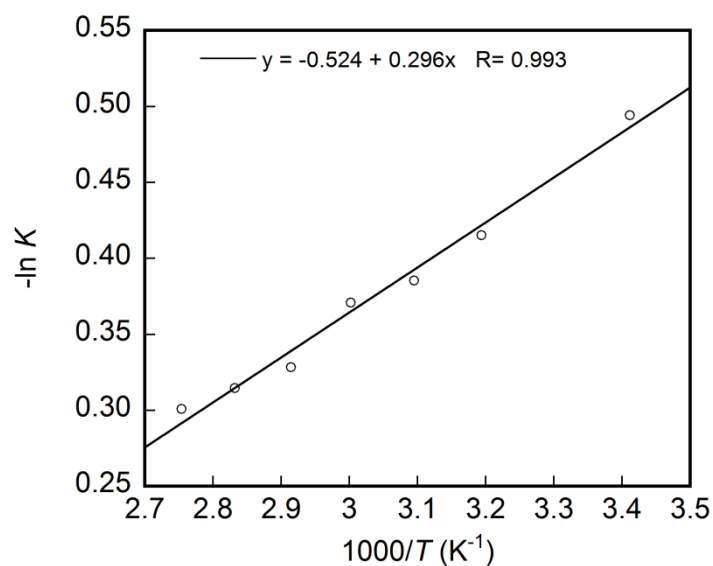

**Figure S9.** A van't Hoff plot of  $\ln K$  vs.  $1/T$  for the temperature dependence of the equilibrium between **1a** and **1b** in toluene- $d_8$ .

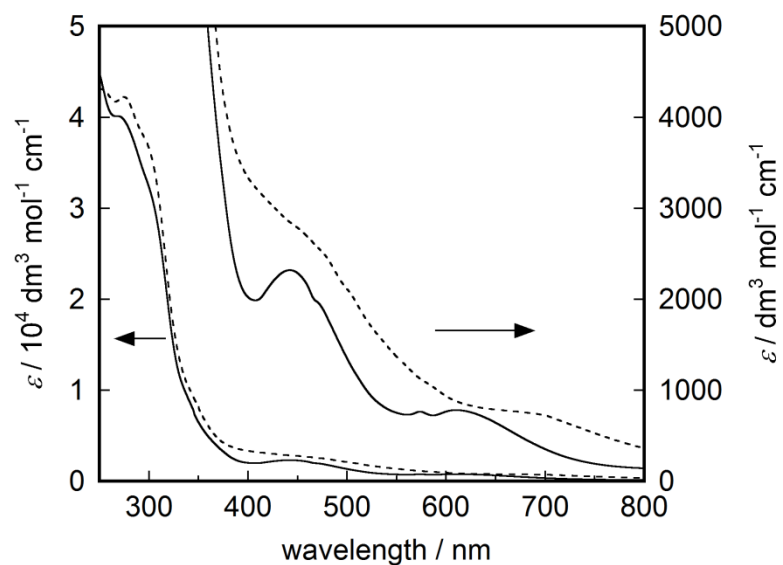

**Figure S10.** Absorption spectra of complexes **2** (- - -) and **3** (—).

**Table S1.** UV-vis absorption spectral data for **2** and **3**

| complex  | $\lambda_{\text{max or sh}} / \text{nm}, (\epsilon / \text{M}^{-1}\text{cm}^{-1})$               |
|----------|--------------------------------------------------------------------------------------------------|
| <b>2</b> | 680 (760), <sup>a</sup> 480 (2400), <sup>a</sup> 300 (34600), <sup>a</sup> 275 (42200)           |
| <b>3</b> | 612 (780), 574 (750), 470 (1960), <sup>a</sup> 442 (2320), 305 (30200), <sup>a</sup> 268 (40100) |

<sup>a</sup> Shoulder.

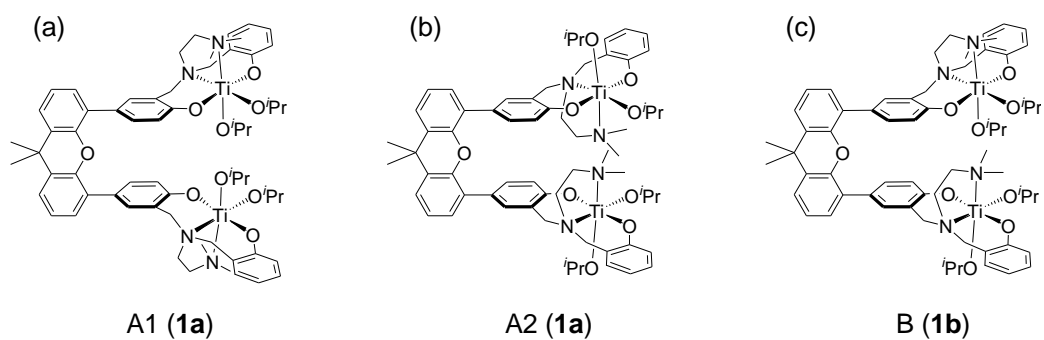

**Figure S11.** Schematic models (a) A1, (b) A2, and (c) B.

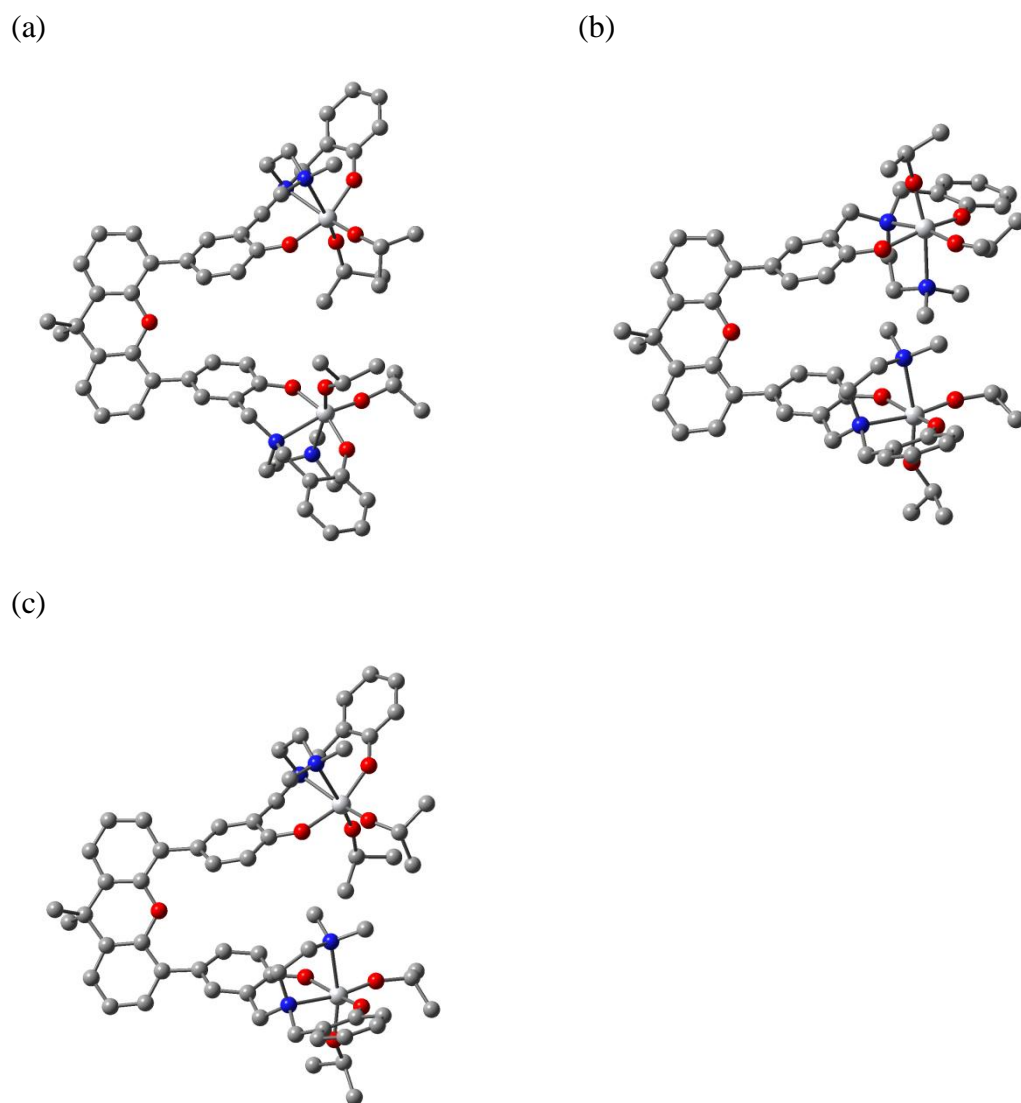

**Figure S12.** Optimized structures of (a) A1, (b) A2, and (c) B.



**Table S2.** Molecular coordinates of A1 optimized by the DFT calculation at the B3LYP/LANL2DZ level

|    | Atomic number | x/Å       | y/Å       | z/Å       |
|----|---------------|-----------|-----------|-----------|
| 1  | 6             | 0.576758  | 8.997383  | -1.302669 |
| 2  | 6             | -3.342654 | 7.235024  | -0.480621 |
| 3  | 6             | -2.149577 | 7.954267  | -0.343658 |
| 4  | 6             | 0.21677   | 9.067602  | 1.219967  |
| 5  | 6             | 0.369201  | 8.129446  | -0.019956 |
| 6  | 6             | -0.912227 | 7.295486  | -0.181472 |
| 7  | 6             | -3.308271 | 5.832452  | -0.456697 |
| 8  | 6             | -0.907134 | 5.88554   | -0.168847 |
| 9  | 6             | -2.098986 | 5.119409  | -0.296525 |
| 10 | 6             | 1.597884  | 7.227281  | 0.180659  |
| 11 | 6             | 2.867277  | 7.818842  | 0.353876  |
| 12 | 6             | -1.275437 | 2.796714  | -0.9911   |
| 13 | 6             | 1.514864  | 5.819832  | 0.185396  |
| 14 | 6             | -2.162672 | 3.62852   | -0.267606 |
| 15 | 6             | 8.922673  | -2.025425 | -1.114377 |
| 16 | 6             | 4.015068  | 7.035969  | 0.524786  |
| 17 | 6             | 9.740687  | -3.135097 | -0.823998 |
| 18 | 6             | -1.472368 | 1.408419  | -1.051746 |
| 19 | 6             | 6.644034  | -0.92173  | -1.319082 |
| 20 | 6             | 2.659439  | 4.989305  | 0.34507   |
| 21 | 6             | 3.902834  | 5.637516  | 0.521381  |
| 22 | 6             | 7.536366  | -2.058089 | -0.87546  |
| 23 | 6             | 3.690438  | 2.800074  | -0.307837 |
| 24 | 6             | -3.220929 | 3.002021  | 0.436874  |
| 25 | 6             | 4.877329  | 0.694217  | -1.063388 |
| 26 | 6             | 9.154692  | -4.299275 | -0.286457 |
| 27 | 6             | 6.212091  | 0.079837  | 0.95107   |
| 28 | 6             | 2.635774  | 3.497812  | 0.329076  |
| 29 | 6             | 3.79249   | 1.399664  | -0.28151  |
| 30 | 6             | -2.556791 | 0.803725  | -0.376049 |
| 31 | 6             | -3.422781 | 1.614578  | 0.404908  |
| 32 | 6             | 6.954085  | -3.228438 | -0.315139 |
| 33 | 6             | -3.992914 | -0.978575 | -3.273319 |
| 34 | 6             | 7.77396   | -4.346711 | -0.029162 |
| 35 | 6             | 6.329837  | -1.010786 | 2.027695  |
| 36 | 6             | -5.442218 | 0.464152  | -1.922663 |
| 37 | 6             | 1.652759  | 2.72691   | 0.99613   |
| 38 | 6             | 2.815562  | 0.64577   | 0.425108  |

|    |   |           |           |           |
|----|---|-----------|-----------|-----------|
| 39 | 6 | -4.476835 | 0.95547   | 1.262309  |
| 40 | 6 | 1.744985  | 1.329948  | 1.049971  |
| 41 | 6 | -6.166349 | 0.608111  | -0.574631 |
| 42 | 6 | -6.226634 | -1.747324 | -2.701429 |
| 43 | 6 | 4.12967   | -0.864232 | 3.144131  |
| 44 | 6 | 5.264514  | -3.005041 | 2.975316  |
| 45 | 6 | -6.368702 | -0.484429 | 1.650723  |
| 46 | 6 | -7.424745 | -1.475839 | 1.217858  |
| 47 | 6 | -7.057082 | -2.616377 | 0.450676  |
| 48 | 6 | -8.762606 | -1.32988  | 1.634617  |
| 49 | 6 | -8.039144 | -3.586186 | 0.131256  |
| 50 | 6 | -9.737122 | -2.295259 | 1.320019  |
| 51 | 6 | -9.364618 | -3.428002 | 0.566515  |
| 52 | 7 | 5.608103  | -0.419513 | -0.330659 |
| 53 | 7 | -5.054429 | -0.955231 | -2.215705 |
| 54 | 7 | 5.02286   | -1.699764 | 2.28369   |
| 55 | 7 | -5.415659 | -0.013579 | 0.567933  |
| 56 | 8 | 0.285225  | 5.154565  | 0.000848  |
| 57 | 8 | 3.677575  | -2.182601 | -1.677936 |
| 58 | 8 | -2.797694 | -0.526384 | -0.48566  |
| 59 | 8 | 5.631835  | -3.260262 | -0.027658 |
| 60 | 8 | 2.911231  | -0.700798 | 0.511407  |
| 61 | 8 | -3.34022  | -3.197132 | -1.15598  |
| 62 | 8 | 3.0072    | -3.427112 | 0.82242   |
| 63 | 8 | -3.628547 | -2.230155 | 1.532154  |
| 64 | 8 | -5.78452  | -2.774681 | 0.012625  |
| 65 | 1 | 7.30619   | -5.23694  | 0.383347  |
| 66 | 1 | 9.772505  | -5.167521 | -0.06623  |
| 67 | 1 | 10.809315 | -3.094619 | -1.01798  |
| 68 | 1 | 9.366072  | -1.12761  | -1.544172 |
| 69 | 1 | 7.272025  | -0.068266 | -1.6282   |
| 70 | 1 | 6.061093  | -1.246405 | -2.190089 |
| 71 | 1 | 5.828211  | -2.856205 | 3.912995  |
| 72 | 1 | 4.300778  | -3.465332 | 3.208584  |
| 73 | 1 | 5.815118  | -3.671611 | 2.310203  |
| 74 | 1 | 4.541002  | -0.787531 | 4.166199  |
| 75 | 1 | 4.016488  | 0.138076  | 2.730653  |
| 76 | 1 | 3.137146  | -1.319586 | 3.180435  |
| 77 | 1 | 6.708088  | -0.547763 | 2.957741  |
| 78 | 1 | 7.054673  | -1.765688 | 1.720677  |
| 79 | 1 | 7.213082  | 0.502757  | 0.764623  |

|     |   |           |           |           |
|-----|---|-----------|-----------|-----------|
| 80  | 1 | 5.578311  | 0.892939  | 1.318203  |
| 81  | 1 | 4.449497  | 0.214242  | -1.950932 |
| 82  | 1 | 5.617553  | 1.438161  | -1.404805 |
| 83  | 1 | 4.439305  | 3.364847  | -0.861091 |
| 84  | 1 | 0.989525  | 0.741853  | 1.562895  |
| 85  | 1 | 0.817081  | 3.22407   | 1.475702  |
| 86  | 1 | 4.78686   | 5.028162  | 0.684881  |
| 87  | 1 | 4.983843  | 7.506551  | 0.669776  |
| 88  | 1 | 2.956474  | 8.901591  | 0.357702  |
| 89  | 1 | 1.474424  | 9.620644  | -1.213568 |
| 90  | 1 | -0.278949 | 9.662712  | -1.468177 |
| 91  | 1 | 0.689857  | 8.35961   | -2.187281 |
| 92  | 1 | -0.640816 | 9.740289  | 1.10184   |
| 93  | 1 | 0.067481  | 8.479924  | 2.133414  |
| 94  | 1 | 1.110575  | 9.687734  | 1.354968  |
| 95  | 1 | -2.177773 | 9.040102  | -0.364883 |
| 96  | 1 | -4.286213 | 7.757093  | -0.615166 |
| 97  | 1 | -4.227529 | 5.269672  | -0.591306 |
| 98  | 1 | -0.433965 | 3.239136  | -1.51356  |
| 99  | 1 | -0.792406 | 0.773655  | -1.612705 |
| 100 | 1 | -3.887128 | 3.613899  | 1.043051  |
| 101 | 1 | -3.984289 | 0.359559  | 2.040865  |
| 102 | 1 | -5.082708 | 1.734325  | 1.757047  |
| 103 | 1 | -7.14545  | 0.122376  | -0.628903 |
| 104 | 1 | -6.344249 | 1.679103  | -0.381704 |
| 105 | 1 | -4.533667 | 1.067689  | -1.928127 |
| 106 | 1 | -6.101184 | 0.852935  | -2.720398 |
| 107 | 1 | -3.095095 | -0.483138 | -2.900932 |
| 108 | 1 | -4.345075 | -0.478907 | -4.192474 |
| 109 | 1 | -3.74146  | -2.017686 | -3.495391 |
| 110 | 1 | -5.944622 | -2.801136 | -2.762494 |
| 111 | 1 | -6.546812 | -1.39086  | -3.696147 |
| 112 | 1 | -7.064902 | -1.666992 | -2.008685 |
| 113 | 1 | -6.862503 | 0.395851  | 2.098089  |
| 114 | 1 | -5.72924  | -0.929297 | 2.421735  |
| 115 | 1 | -9.042054 | -0.454311 | 2.219916  |
| 116 | 1 | -10.76337 | -2.168353 | 1.654419  |
| 117 | 1 | -10.10623 | -4.184118 | 0.317269  |
| 118 | 1 | -7.735019 | -4.451824 | -0.451205 |
| 119 | 6 | -3.906921 | -3.133663 | 2.628602  |
| 120 | 1 | -4.99735  | -3.30145  | 2.658623  |

|     |    |           |           |           |
|-----|----|-----------|-----------|-----------|
| 121 | 6  | -3.446804 | -2.478096 | 3.9423    |
| 122 | 1  | -2.368115 | -2.281522 | 3.903509  |
| 123 | 1  | -3.961422 | -1.522538 | 4.105165  |
| 124 | 1  | -3.656911 | -3.133758 | 4.798471  |
| 125 | 6  | -3.212605 | -4.485351 | 2.382768  |
| 126 | 1  | -3.416209 | -5.179793 | 3.209622  |
| 127 | 1  | -3.57946  | -4.933069 | 1.453096  |
| 128 | 1  | -2.128266 | -4.340548 | 2.300825  |
| 129 | 6  | -2.697978 | -4.456144 | -1.432712 |
| 130 | 1  | -2.111053 | -4.722848 | -0.53915  |
| 131 | 6  | -1.737013 | -4.293254 | -2.623261 |
| 132 | 1  | -1.169857 | -5.219634 | -2.788633 |
| 133 | 1  | -2.296117 | -4.062358 | -3.539687 |
| 134 | 1  | -1.031933 | -3.477528 | -2.430961 |
| 135 | 6  | -3.764465 | -5.539584 | -1.679544 |
| 136 | 1  | -4.456741 | -5.594578 | -0.832005 |
| 137 | 1  | -4.34559  | -5.302761 | -2.580461 |
| 138 | 1  | -3.290922 | -6.521368 | -1.817764 |
| 139 | 6  | 2.229463  | -4.542538 | 1.283596  |
| 140 | 1  | 2.274378  | -4.535029 | 2.386697  |
| 141 | 6  | 2.809927  | -2.280465 | -2.826463 |
| 142 | 1  | 3.349693  | -1.821493 | -3.67236  |
| 143 | 6  | 2.560193  | -3.763831 | -3.155307 |
| 144 | 1  | 2.018883  | -4.246566 | -2.332624 |
| 145 | 1  | 1.965147  | -3.861467 | -4.073943 |
| 146 | 1  | 3.514403  | -4.285193 | -3.293848 |
| 147 | 6  | 1.506484  | -1.496212 | -2.579673 |
| 148 | 1  | 0.974036  | -1.905945 | -1.713649 |
| 149 | 1  | 1.72343   | -0.442132 | -2.370619 |
| 150 | 1  | 0.853184  | -1.553124 | -3.461634 |
| 151 | 6  | 0.763381  | -4.365383 | 0.851143  |
| 152 | 1  | 0.685384  | -4.392316 | -0.242896 |
| 153 | 1  | 0.142386  | -5.171132 | 1.266712  |
| 154 | 1  | 0.373825  | -3.401717 | 1.1974    |
| 155 | 6  | 2.84897   | -5.856119 | 0.769337  |
| 156 | 1  | 2.309697  | -6.722003 | 1.177744  |
| 157 | 1  | 2.799253  | -5.893856 | -0.325812 |
| 158 | 1  | 3.902567  | -5.921507 | 1.063069  |
| 159 | 22 | -4.100072 | -1.88467  | -0.198187 |
| 160 | 22 | 4.049878  | -2.176753 | 0.093881  |

---

**Table S3.** Molecular coordinates of A2 optimized by the DFT calculation at the B3LYP/LANL2DZ level

|    | Atomic number | x/Å       | y/Å       | z/Å       |
|----|---------------|-----------|-----------|-----------|
| 1  | 6             | 1.141252  | 9.034996  | -1.189355 |
| 2  | 6             | -2.888032 | 7.38876   | -1.501056 |
| 3  | 6             | -1.755369 | 8.070195  | -1.041792 |
| 4  | 6             | 0.10824   | 9.111991  | 1.141064  |
| 5  | 6             | 0.569351  | 8.172112  | -0.018833 |
| 6  | 6             | -0.641077 | 7.373432  | -0.527941 |
| 7  | 6             | -2.920467 | 5.988134  | -1.438698 |
| 8  | 6             | -0.69425  | 5.964417  | -0.490251 |
| 9  | 6             | -1.8393   | 5.23675   | -0.923601 |
| 10 | 6             | 1.673923  | 7.238931  | 0.500205  |
| 11 | 6             | 2.868834  | 7.800182  | 0.998371  |
| 12 | 6             | -0.957935 | 2.849881  | -1.221683 |
| 13 | 6             | 1.552073  | 5.834038  | 0.485885  |
| 14 | 6             | -1.987577 | 3.752683  | -0.865384 |
| 15 | 6             | 7.998589  | -2.310282 | -2.22372  |
| 16 | 6             | 3.913009  | 6.9916    | 1.461051  |
| 17 | 6             | 8.339438  | -3.483489 | -2.923319 |
| 18 | 6             | -1.188488 | 1.467785  | -1.248352 |
| 19 | 6             | 6.578382  | -1.038533 | -0.544752 |
| 20 | 6             | 2.601798  | 4.97814   | 0.924732  |
| 21 | 6             | 3.772501  | 5.596707  | 1.419411  |
| 22 | 6             | 6.872559  | -2.263355 | -1.379418 |
| 23 | 6             | 3.733051  | 2.77901   | 0.517735  |
| 24 | 6             | -3.248159 | 3.201769  | -0.525554 |
| 25 | 6             | 5.139064  | 0.687719  | 0.314277  |
| 26 | 6             | 7.532672  | -4.630692 | -2.776182 |
| 27 | 6             | 4.630623  | -0.315225 | -1.934709 |
| 28 | 6             | 2.563415  | 3.486799  | 0.890446  |
| 29 | 6             | 3.818078  | 1.378795  | 0.569643  |
| 30 | 6             | -2.457817 | 0.933278  | -0.926542 |
| 31 | 6             | -3.504337 | 1.821723  | -0.56036  |
| 32 | 6             | 6.056508  | -3.420213 | -1.243704 |
| 33 | 6             | 6.398069  | -4.599908 | -1.948846 |
| 34 | 6             | 3.11599   | -0.531434 | -2.073198 |
| 35 | 6             | 1.446682  | 2.725106  | 1.306752  |
| 36 | 6             | 2.685633  | 0.631744  | 0.991996  |
| 37 | 6             | -4.903204 | 1.297438  | -0.32461  |
| 38 | 6             | 1.507266  | 1.325491  | 1.355079  |

|    |   |           |           |           |
|----|---|-----------|-----------|-----------|
| 39 | 6 | -5.621471 | -1.937983 | -3.203846 |
| 40 | 6 | 3.010064  | -2.943219 | -2.593282 |
| 41 | 6 | 1.215563  | -1.894756 | -1.338    |
| 42 | 6 | -6.515766 | -0.208665 | 0.637171  |
| 43 | 6 | -6.962991 | -1.417273 | 1.427702  |
| 44 | 6 | -6.367452 | -2.684529 | 1.177497  |
| 45 | 6 | -8.040287 | -1.329023 | 2.328869  |
| 46 | 6 | -6.881722 | -3.835025 | 1.823092  |
| 47 | 6 | -8.549285 | -2.472413 | 2.975267  |
| 48 | 6 | -7.965967 | -3.72802  | 2.710703  |
| 49 | 7 | 5.131849  | -0.564388 | -0.539728 |
| 50 | 7 | 2.692352  | -1.884872 | -1.585598 |
| 51 | 7 | -5.024383 | 0.05982   | 0.551008  |
| 52 | 8 | 0.384889  | 5.201114  | 0.00671   |
| 53 | 8 | 4.917672  | -2.065608 | 1.979525  |
| 54 | 8 | -2.6675   | -0.405358 | -0.946203 |
| 55 | 8 | 4.951786  | -3.39091  | -0.46104  |
| 56 | 8 | 2.720813  | -0.72278  | 1.010538  |
| 57 | 8 | -3.036136 | -3.159587 | -1.131095 |
| 58 | 8 | 2.637074  | -3.505446 | 0.979327  |
| 59 | 8 | -5.296671 | -2.78718  | 0.353046  |
| 60 | 1 | 5.76637   | -5.475619 | -1.825911 |
| 61 | 1 | 7.786263  | -5.546121 | -3.306807 |
| 62 | 1 | 9.21482   | -3.503937 | -3.56709  |
| 63 | 1 | 8.620663  | -1.42175  | -2.327099 |
| 64 | 1 | 6.80822   | -1.245445 | 0.507008  |
| 65 | 1 | 7.222264  | -0.20784  | -0.88066  |
| 66 | 1 | 0.65748   | -1.61824  | -2.248353 |
| 67 | 1 | 0.91478   | -2.898437 | -1.026579 |
| 68 | 1 | 0.979029  | -1.20073  | -0.531809 |
| 69 | 1 | 2.384985  | -2.816327 | -3.494416 |
| 70 | 1 | 4.060852  | -2.907459 | -2.88092  |
| 71 | 1 | 2.820661  | -3.925882 | -2.154475 |
| 72 | 1 | 2.834404  | -0.400189 | -3.133865 |
| 73 | 1 | 2.574532  | 0.219579  | -1.49605  |
| 74 | 1 | 4.874522  | 0.711674  | -2.252428 |
| 75 | 1 | 5.164165  | -0.996914 | -2.603796 |
| 76 | 1 | 5.840386  | 1.411274  | -0.136097 |
| 77 | 1 | 5.562984  | 0.36735   | 1.274356  |
| 78 | 1 | 4.601421  | 3.339363  | 0.174929  |
| 79 | 1 | 0.64848   | 0.744633  | 1.676213  |

|     |   |           |           |           |
|-----|---|-----------|-----------|-----------|
| 80  | 1 | 0.529716  | 3.23092   | 1.588904  |
| 81  | 1 | 4.569453  | 4.966296  | 1.802512  |
| 82  | 1 | 4.821049  | 7.438591  | 1.856584  |
| 83  | 1 | 2.980085  | 8.880462  | 1.02662   |
| 84  | 1 | 1.993927  | 9.637277  | -0.854245 |
| 85  | 1 | 0.380608  | 9.721264  | -1.579564 |
| 86  | 1 | 1.477946  | 8.394075  | -2.012752 |
| 87  | 1 | -0.670593 | 9.80406   | 0.800288  |
| 88  | 1 | -0.296057 | 8.526413  | 1.975182  |
| 89  | 1 | 0.945841  | 9.710439  | 1.518017  |
| 90  | 1 | -1.733278 | 9.155495  | -1.086354 |
| 91  | 1 | -3.731603 | 7.937673  | -1.910748 |
| 92  | 1 | -3.785848 | 5.455572  | -1.821426 |
| 93  | 1 | 0.024863  | 3.23277   | -1.473098 |
| 94  | 1 | -0.396412 | 0.778634  | -1.523355 |
| 95  | 1 | -4.051972 | 3.870145  | -0.221501 |
| 96  | 1 | -5.520404 | 2.101066  | 0.112172  |
| 97  | 1 | -5.349697 | 1.006501  | -1.2827   |
| 98  | 1 | -4.989299 | -2.793028 | -3.499098 |
| 99  | 1 | -6.837572 | -0.323032 | -0.405143 |
| 100 | 1 | -7.006296 | 0.691329  | 1.04623   |
| 101 | 1 | -8.494288 | -0.356867 | 2.518678  |
| 102 | 1 | -9.384292 | -2.386403 | 3.665508  |
| 103 | 1 | -8.353027 | -4.621441 | 3.196356  |
| 104 | 1 | -6.421385 | -4.796544 | 1.610327  |
| 105 | 6 | -3.876531 | -1.019317 | 2.538033  |
| 106 | 6 | -2.648093 | -4.499599 | -1.485152 |
| 107 | 1 | -2.007062 | -4.875671 | -0.669039 |
| 108 | 6 | -1.824191 | -4.462324 | -2.784264 |
| 109 | 1 | -1.466286 | -5.468249 | -3.043498 |
| 110 | 1 | -2.439779 | -4.084165 | -3.610098 |
| 111 | 1 | -0.961431 | -3.796949 | -2.668246 |
| 112 | 6 | -3.892222 | -5.401716 | -1.592997 |
| 113 | 1 | -4.501992 | -5.311898 | -0.688161 |
| 114 | 1 | -4.508529 | -5.100501 | -2.449864 |
| 115 | 1 | -3.595387 | -6.450829 | -1.728135 |
| 116 | 6 | 2.07261   | -4.816732 | 1.167401  |
| 117 | 1 | 1.42481   | -5.01772  | 0.295746  |
| 118 | 6 | 5.209811  | -2.05744  | 3.39346   |
| 119 | 1 | 6.028708  | -1.333441 | 3.545008  |
| 120 | 6 | 3.978745  | -1.593396 | 4.195577  |

|     |    |           |           |           |
|-----|----|-----------|-----------|-----------|
| 121 | 1  | 3.149834  | -2.297474 | 4.053954  |
| 122 | 1  | 4.219149  | -1.537826 | 5.266386  |
| 123 | 1  | 3.644753  | -0.607027 | 3.855672  |
| 124 | 6  | 5.702872  | -3.451974 | 3.821248  |
| 125 | 1  | 4.900847  | -4.190015 | 3.696017  |
| 126 | 1  | 6.553915  | -3.760499 | 3.203052  |
| 127 | 1  | 6.014018  | -3.445927 | 4.87509   |
| 128 | 6  | 3.189751  | -5.876568 | 1.209699  |
| 129 | 1  | 3.807361  | -5.742476 | 2.106493  |
| 130 | 1  | 2.759823  | -6.887651 | 1.226645  |
| 131 | 1  | 3.839993  | -5.772895 | 0.335192  |
| 132 | 6  | 1.204696  | -4.815733 | 2.437959  |
| 133 | 1  | 0.71255   | -5.789051 | 2.571453  |
| 134 | 1  | 1.827778  | -4.614594 | 3.318426  |
| 135 | 1  | 0.437777  | -4.035182 | 2.374492  |
| 136 | 6  | -4.39276  | 0.278628  | 1.897452  |
| 137 | 1  | -3.564495 | 0.980787  | 1.762673  |
| 138 | 1  | -5.112645 | 0.751818  | 2.585228  |
| 139 | 1  | -3.366387 | -0.766229 | 3.485248  |
| 140 | 1  | -4.711668 | -1.676675 | 2.782764  |
| 141 | 7  | -2.945039 | -1.768127 | 1.631248  |
| 142 | 6  | -2.826426 | -3.189154 | 2.084622  |
| 143 | 1  | -2.474886 | -3.242712 | 3.129637  |
| 144 | 1  | -3.794746 | -3.683017 | 1.992576  |
| 145 | 1  | -2.107496 | -3.706543 | 1.443176  |
| 146 | 6  | -1.582245 | -1.153201 | 1.638672  |
| 147 | 1  | -1.103013 | -1.284688 | 2.624416  |
| 148 | 1  | -0.966636 | -1.627498 | 0.872125  |
| 149 | 1  | -1.640073 | -0.089542 | 1.40709   |
| 150 | 8  | -5.041761 | -1.361807 | -2.009701 |
| 151 | 6  | -5.597205 | -0.888192 | -4.327351 |
| 152 | 1  | -6.222501 | -0.027064 | -4.056819 |
| 153 | 1  | -4.57315  | -0.532845 | -4.490508 |
| 154 | 1  | -5.978239 | -1.314131 | -5.266004 |
| 155 | 6  | -7.041057 | -2.450115 | -2.896719 |
| 156 | 1  | -7.465428 | -2.961299 | -3.77203  |
| 157 | 1  | -7.016949 | -3.150265 | -2.054406 |
| 158 | 1  | -7.700742 | -1.612544 | -2.633062 |
| 159 | 22 | -3.972575 | -1.737415 | -0.582646 |
| 160 | 22 | 3.817943  | -2.226998 | 0.548774  |

---



**Table S4.** Molecular coordinates of B optimized by the DFT calculation at the B3LYP/LANL2DZ level

|    | Atomic number | x/Å       | y/Å       | z/Å       |
|----|---------------|-----------|-----------|-----------|
| 1  | 6             | -0.041327 | 9.146586  | 1.113192  |
| 2  | 6             | 3.827873  | 7.193784  | 0.648529  |
| 3  | 6             | 2.676125  | 7.945523  | 0.389351  |
| 4  | 6             | 0.445622  | 9.04555   | -1.387349 |
| 5  | 6             | 0.193115  | 8.19322   | -0.102374 |
| 6  | 6             | 1.428468  | 7.321592  | 0.177419  |
| 7  | 6             | 3.740395  | 5.794856  | 0.700786  |
| 8  | 6             | 1.370893  | 5.913668  | 0.231645  |
| 9  | 6             | 2.519964  | 5.113596  | 0.488426  |
| 10 | 6             | -1.060414 | 7.329199  | -0.313884 |
| 11 | 6             | -2.298643 | 7.958536  | -0.563059 |
| 12 | 6             | 1.531744  | 2.866318  | 1.217736  |
| 13 | 6             | -1.028908 | 5.920514  | -0.263419 |
| 14 | 6             | 2.530369  | 3.622484  | 0.557375  |
| 15 | 6             | -8.7425   | -1.646513 | 0.909269  |
| 16 | 6             | -3.46749  | 7.212292  | -0.753617 |
| 17 | 6             | -9.584022 | -2.734496 | 0.605277  |
| 18 | 6             | 1.659857  | 1.47905   | 1.369519  |
| 19 | 6             | -6.441945 | -0.608529 | 1.184998  |
| 20 | 6             | -2.196302 | 5.127781  | -0.448536 |
| 21 | 6             | -3.407065 | 5.811662  | -0.698278 |
| 22 | 6             | -7.349526 | -1.727019 | 0.725654  |
| 23 | 6             | -3.321949 | 2.988415  | 0.222555  |
| 24 | 6             | 3.643085  | 2.917838  | 0.036301  |
| 25 | 6             | -4.609799 | 0.941419  | 0.974699  |
| 26 | 6             | -9.01583  | -3.925587 | 0.1094    |
| 27 | 6             | -5.882804 | 0.333878  | -1.079671 |
| 28 | 6             | -2.226101 | 3.637358  | -0.395149 |
| 29 | 6             | -3.4703   | 1.591255  | 0.222841  |
| 30 | 6             | 2.79333   | 0.793038  | 0.871578  |
| 31 | 6             | 3.797357  | 1.529954  | 0.186924  |
| 32 | 6             | -6.784405 | -2.925306 | 0.20878   |
| 33 | 6             | -7.628434 | -4.021317 | -0.092226 |
| 34 | 6             | -5.988437 | -0.771815 | -2.141471 |
| 35 | 6             | -1.254    | 2.821272  | -1.021672 |
| 36 | 6             | -2.496853 | 0.790284  | -0.433854 |
| 37 | 6             | 5.067857  | 0.84926   | -0.272908 |
| 38 | 6             | -1.393153 | 1.42816   | -1.049251 |

|    |   |           |           |           |
|----|---|-----------|-----------|-----------|
| 39 | 6 | 5.747915  | -1.679301 | 3.063736  |
| 40 | 6 | -3.737301 | -0.719535 | -3.161866 |
| 41 | 6 | -4.956593 | -2.81247  | -3.017814 |
| 42 | 6 | 6.31295   | -0.916735 | -1.33363  |
| 43 | 6 | 6.474392  | -2.229871 | -2.064935 |
| 44 | 6 | 5.837311  | -3.39677  | -1.559757 |
| 45 | 6 | 7.3341    | -2.340615 | -3.173251 |
| 46 | 6 | 6.093157  | -4.649514 | -2.167327 |
| 47 | 6 | 7.585565  | -3.585934 | -3.782232 |
| 48 | 6 | 6.963879  | -4.741268 | -3.266705 |
| 49 | 7 | -5.348742 | -0.160429 | 0.233962  |
| 50 | 7 | -4.69564  | -1.509292 | -2.328222 |
| 51 | 7 | 4.900329  | -0.480654 | -0.988657 |
| 52 | 8 | 0.163835  | 5.21866   | 0.004518  |
| 53 | 8 | -3.530909 | -1.990332 | 1.676916  |
| 54 | 8 | 2.909647  | -0.547414 | 1.028836  |
| 55 | 8 | -5.452909 | -3.00697  | -0.024367 |
| 56 | 8 | -2.624532 | -0.557339 | -0.485472 |
| 57 | 8 | 3.068994  | -3.283587 | 1.459114  |
| 58 | 8 | -2.809837 | -3.311094 | -0.766653 |
| 59 | 8 | 4.967122  | -3.30309  | -0.526027 |
| 60 | 1 | -7.174818 | -4.932505 | -0.473423 |
| 61 | 1 | -9.652495 | -4.777134 | -0.121743 |
| 62 | 1 | -10.65744 | -2.656719 | 0.756392  |
| 63 | 1 | -9.173044 | -0.727618 | 1.306223  |
| 64 | 1 | -7.056678 | 0.269931  | 1.447915  |
| 65 | 1 | -5.912326 | -0.930389 | 2.090376  |
| 66 | 1 | -5.473177 | -2.650542 | -3.980069 |
| 67 | 1 | -4.001219 | -3.310032 | -3.201705 |
| 68 | 1 | -5.561366 | -3.449649 | -2.371315 |
| 69 | 1 | -4.099707 | -0.649841 | -4.202539 |
| 70 | 1 | -3.60958  | 0.286861  | -2.762636 |
| 71 | 1 | -2.761402 | -1.210606 | -3.144303 |
| 72 | 1 | -6.308435 | -0.314128 | -3.095566 |
| 73 | 1 | -6.751414 | -1.496847 | -1.855888 |
| 74 | 1 | -6.877556 | 0.789581  | -0.943743 |
| 75 | 1 | -5.210377 | 1.121037  | -1.433942 |
| 76 | 1 | -4.237354 | 0.471098  | 1.891601  |
| 77 | 1 | -5.3351   | 1.719076  | 1.27033   |
| 78 | 1 | -4.069014 | 3.589872  | 0.738231  |
| 79 | 1 | -0.652105 | 0.806657  | -1.541407 |

|     |   |           |           |           |
|-----|---|-----------|-----------|-----------|
| 80  | 1 | -0.390991 | 3.281588  | -1.490189 |
| 81  | 1 | -4.305252 | 5.228017  | -0.878363 |
| 82  | 1 | -4.41137  | 7.71185   | -0.954664 |
| 83  | 1 | -2.346315 | 9.04282   | -0.610843 |
| 84  | 1 | -0.907669 | 9.79619   | 0.941998  |
| 85  | 1 | 0.830815  | 9.789188  | 1.280964  |
| 86  | 1 | -0.221318 | 8.569672  | 2.027958  |
| 87  | 1 | 1.326769  | 9.686657  | -1.267025 |
| 88  | 1 | 0.611013  | 8.396847  | -2.255653 |
| 89  | 1 | -0.41251  | 9.693049  | -1.602884 |
| 90  | 1 | 2.744102  | 9.029272  | 0.356716  |
| 91  | 1 | 4.779322  | 7.688823  | 0.823241  |
| 92  | 1 | 4.624339  | 5.212037  | 0.941576  |
| 93  | 1 | 0.655736  | 3.367554  | 1.61444   |
| 94  | 1 | 0.894533  | 0.901974  | 1.880287  |
| 95  | 1 | 4.411633  | 3.46913   | -0.503281 |
| 96  | 1 | 5.625938  | 1.537023  | -0.931431 |
| 97  | 1 | 5.699928  | 0.623959  | 0.593804  |
| 98  | 1 | 5.095913  | -2.411218 | 3.570451  |
| 99  | 1 | 6.82628   | -0.980329 | -0.36587  |
| 100 | 1 | 6.790493  | -0.114306 | -1.921938 |
| 101 | 1 | 7.821647  | -1.445263 | -3.557824 |
| 102 | 1 | 8.254713  | -3.654013 | -4.635933 |
| 103 | 1 | 7.155147  | -5.71117  | -3.721362 |
| 104 | 1 | 5.605995  | -5.531258 | -1.75888  |
| 105 | 6 | 3.253372  | -1.629304 | -2.54111  |
| 106 | 6 | 2.770214  | -4.573793 | 2.030131  |
| 107 | 1 | 2.14915   | -5.11559  | 1.296609  |
| 108 | 6 | 1.95826   | -4.376436 | 3.321471  |
| 109 | 1 | 1.66501   | -5.346645 | 3.745567  |
| 110 | 1 | 2.557667  | -3.834023 | 4.063654  |
| 111 | 1 | 1.054401  | -3.791072 | 3.118532  |
| 112 | 6 | 4.072013  | -5.366269 | 2.257689  |
| 113 | 1 | 4.658009  | -5.40263  | 1.333425  |
| 114 | 1 | 4.681454  | -4.882681 | 3.032018  |
| 115 | 1 | 3.84489   | -6.391116 | 2.582364  |
| 116 | 6 | -2.190847 | -4.607689 | -0.874961 |
| 117 | 1 | -1.558508 | -4.584403 | -1.778231 |
| 118 | 6 | -2.896849 | -1.850749 | 2.963656  |
| 119 | 1 | -3.39065  | -1.006996 | 3.478813  |
| 120 | 6 | -3.136034 | -3.127303 | 3.789846  |

|     |    |           |           |           |
|-----|----|-----------|-----------|-----------|
| 121 | 1  | -2.643258 | -3.984514 | 3.315168  |
| 122 | 1  | -2.73397  | -3.010441 | 4.805493  |
| 123 | 1  | -4.209047 | -3.341693 | 3.85639   |
| 124 | 6  | -1.403172 | -1.516311 | 2.794813  |
| 125 | 1  | -0.87968  | -2.34442  | 2.303305  |
| 126 | 1  | -1.277191 | -0.621351 | 2.175912  |
| 127 | 1  | -0.936472 | -1.339404 | 3.773362  |
| 128 | 6  | -1.294788 | -4.861129 | 0.35121   |
| 129 | 1  | -1.907645 | -4.92269  | 1.258316  |
| 130 | 1  | -0.74266  | -5.803963 | 0.234719  |
| 131 | 1  | -0.575846 | -4.043225 | 0.473996  |
| 132 | 6  | -3.265231 | -5.700454 | -1.037625 |
| 133 | 1  | -2.793556 | -6.690292 | -1.107871 |
| 134 | 1  | -3.944156 | -5.687429 | -0.177303 |
| 135 | 1  | -3.85861  | -5.532915 | -1.94344  |
| 136 | 6  | 4.013402  | -0.338951 | -2.193545 |
| 137 | 1  | 3.300712  | 0.464242  | -1.982664 |
| 138 | 1  | 4.604992  | -0.029104 | -3.070671 |
| 139 | 1  | 2.566993  | -1.417145 | -3.381297 |
| 140 | 1  | 3.950958  | -2.398009 | -2.875928 |
| 141 | 7  | 2.488172  | -2.173933 | -1.37116  |
| 142 | 6  | 2.149415  | -3.611144 | -1.612598 |
| 143 | 1  | 1.564341  | -3.72707  | -2.541813 |
| 144 | 1  | 3.067603  | -4.197015 | -1.675759 |
| 145 | 1  | 1.555295  | -3.980013 | -0.772721 |
| 146 | 6  | 1.217233  | -1.414131 | -1.158232 |
| 147 | 1  | 0.514497  | -1.592989 | -1.989922 |
| 148 | 1  | 0.751524  | -1.730507 | -0.22303  |
| 149 | 1  | 1.418472  | -0.345942 | -1.078652 |
| 150 | 8  | 5.358708  | -1.645281 | 1.670156  |
| 151 | 6  | 5.526982  | -0.295446 | 3.701964  |
| 152 | 1  | 6.17814   | 0.452352  | 3.229578  |
| 153 | 1  | 4.485564  | 0.019811  | 3.574322  |
| 154 | 1  | 5.758187  | -0.325301 | 4.775938  |
| 155 | 6  | 7.208291  | -2.152233 | 3.161924  |
| 156 | 1  | 7.517755  | -2.244599 | 4.212394  |
| 157 | 1  | 7.325113  | -3.125703 | 2.671548  |
| 158 | 1  | 7.873598  | -1.434243 | 2.664491  |
| 159 | 22 | 3.981252  | -2.043342 | 0.544836  |
| 160 | 22 | -3.827981 | -1.990394 | -0.099412 |

---

**Table S5.** Bond distances (Å) for optimized structures of A1, A2, and B (B3LYP/LANL2DZ)

|                                     | A1    | A2    | B     |
|-------------------------------------|-------|-------|-------|
| Ti <sub>a</sub> -O <sub>a</sub> (1) | 1.910 | 1.918 | 1.911 |
| Ti <sub>a</sub> -O <sub>a</sub> (2) | 1.921 | 1.913 | 1.918 |
| Ti <sub>a</sub> -O <sub>a</sub> (3) | 1.784 | 1.793 | 1.796 |
| Ti <sub>a</sub> -O <sub>a</sub> (4) | 1.811 | 1.812 | 1.801 |
| Ti <sub>a</sub> -N <sub>a</sub> (c) | 2.387 | 2.382 | 2.403 |
| Ti <sub>a</sub> -N <sub>a</sub> (t) | 2.443 | 2.437 | 2.440 |
| Ti <sub>b</sub> -O <sub>b</sub> (1) | 1.904 | 1.900 | 1.903 |
| Ti <sub>b</sub> -O <sub>b</sub> (2) | 1.917 | 1.932 | 1.925 |
| Ti <sub>b</sub> -O <sub>b</sub> (3) | 1.794 | 1.789 | 1.791 |
| Ti <sub>b</sub> -O <sub>b</sub> (4) | 1.826 | 1.822 | 1.823 |
| Ti <sub>b</sub> -N <sub>b</sub> (c) | 2.412 | 2.371 | 2.375 |
| Ti <sub>b</sub> -N <sub>b</sub> (t) | 2.418 | 2.441 | 2.433 |

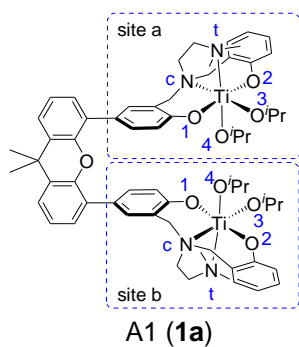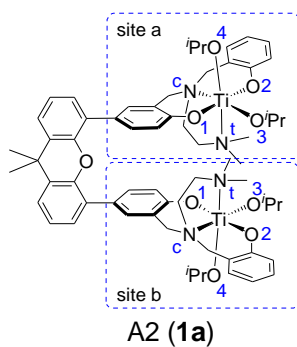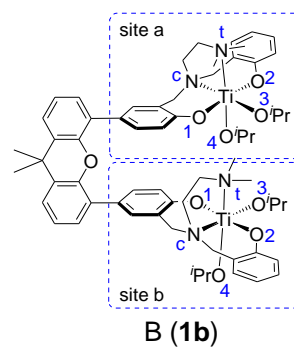

**Table S6.** Calculated results for models A1, A2, and B<sup>a</sup>

|                                       | A1                      | A2                      | B                       |
|---------------------------------------|-------------------------|-------------------------|-------------------------|
|                                       | [Hartree/Particle]      | [Hartree/Particle]      | [Hartree/Particle]      |
| E <sub>el</sub> (RB+HF-LYP)           | -3462.372666            | -3462.373298            | -3462.372672            |
| E <sub>el</sub> + zero-point energy   | -3461.012864            | -3461.013904            | -3461.012854            |
| E <sub>el</sub> + thermal energy      | -3460.933609            | -3460.936272            | -3460.933610            |
| E <sub>el</sub> + thermal enthalpy    | -3460.932665            | -3460.935328            | -3460.932666            |
| E <sub>el</sub> + thermal free energy | -3461.132649            | -3461.130326            | -3461.132338            |
|                                       | $\Delta$ (B-A1)         | $\Delta$ (B-A2)         | $\Delta$ (A2-A1)        |
|                                       | [kJ mol <sup>-1</sup> ] | [kJ mol <sup>-1</sup> ] | [kJ mol <sup>-1</sup> ] |
| E <sub>el</sub> (RB+HF-LYP)           | -0.016                  | 1.643                   | -1.659                  |
| E <sub>el</sub> + zero-point energy   | 0.026                   | 2.756                   | -2.731                  |
| E <sub>el</sub> + thermal energy      | -0.003                  | 6.988                   | -6.992                  |
| E <sub>el</sub> + thermal enthalpy    | -0.003                  | 6.988                   | -6.992                  |
| E <sub>el</sub> + thermal free energy | 0.816                   | -5.283                  | 6.099                   |

<sup>a</sup> Zero-point energy and enthalpic and entropic thermal contributions to thermodynamic properties at 298.15 K and 1 atm were calculated from harmonic vibrational frequencies without scaling factors.
